# Supplementary material for: Solubility of ammonium metal fluorides in aqueous ethanol mixtures – implications for scandium recovery by antisolvent crystallization
Source: RSC Adv. 2023 Jan 5;13(2):1288–94. doi: 10.1039/d2ra07516d (PMC9813942; doi:10.1039/d2ra07516d)
Supplement: RA-013-D2RA07516D-s001 [file RA-013-D2RA07516D-s001.pdf]

## Supplementary Information

### I. Phase determination of synthesized solids before and after solubility tests

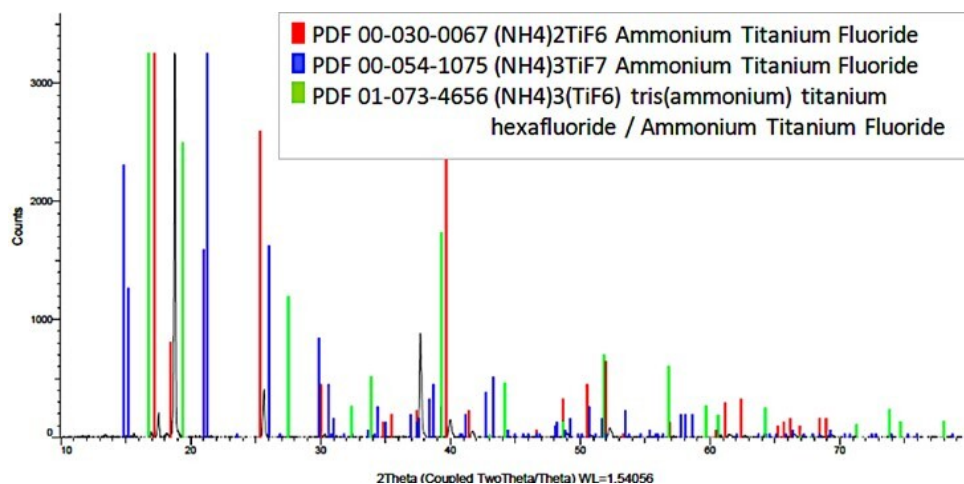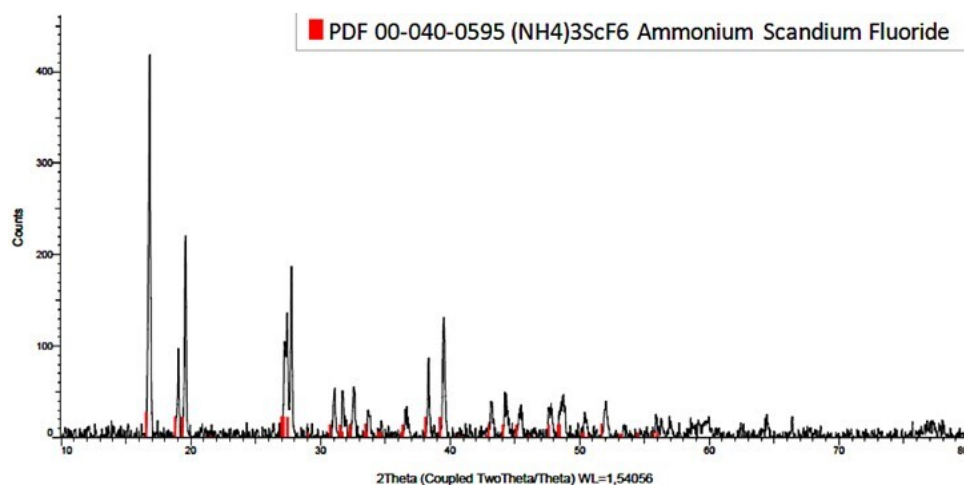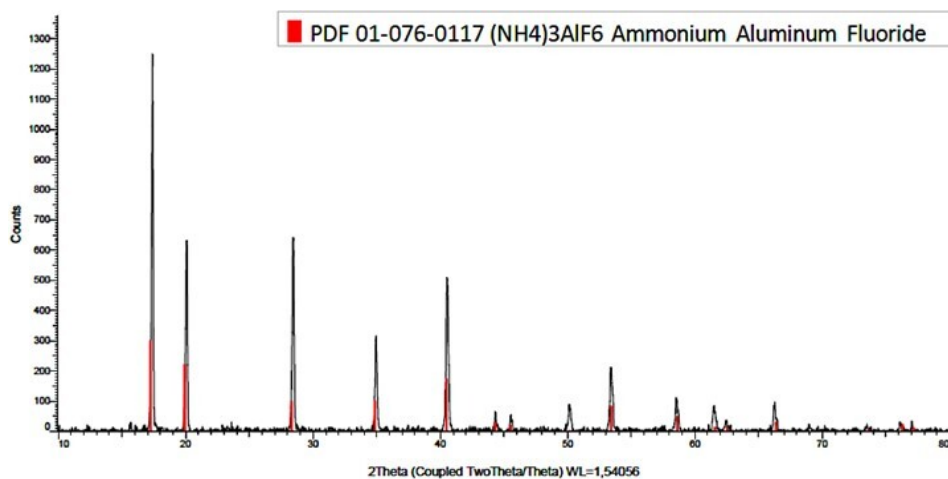

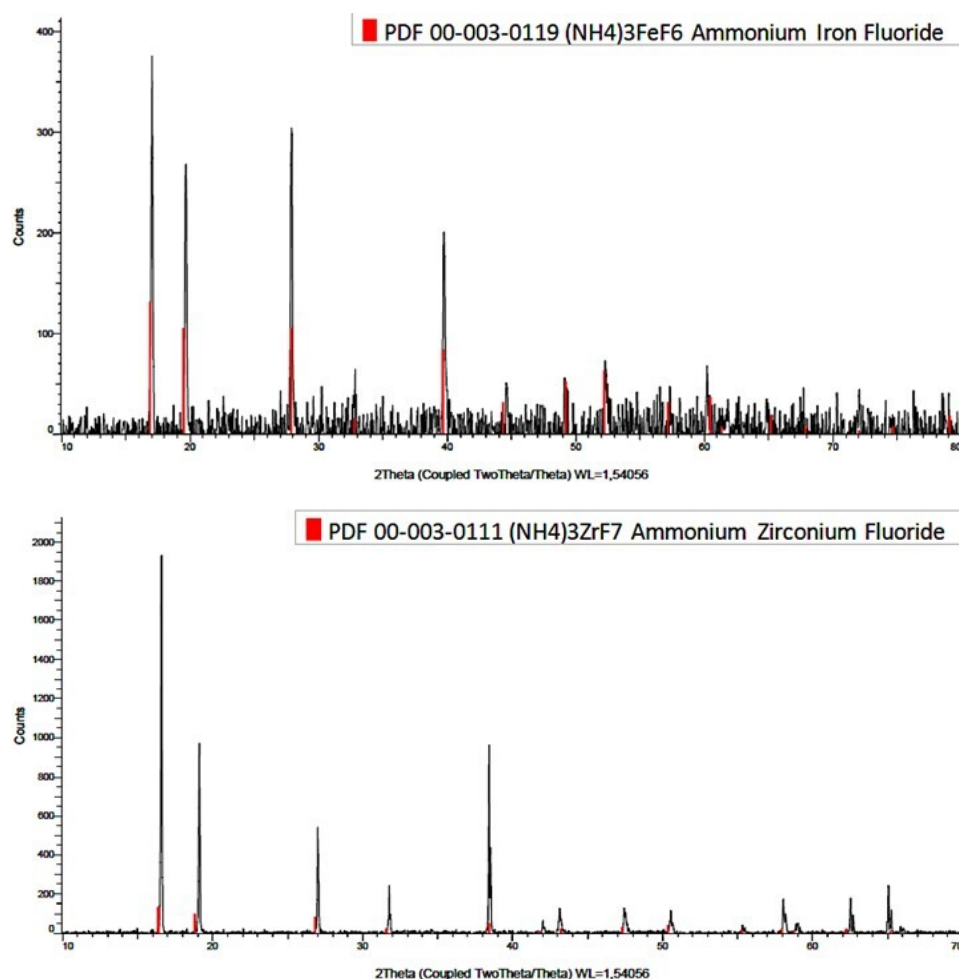

**Figure S1.** XRD patterns of synthesized solids (corresponds to Figure 1 in the article)

## II. Volumetric charge densities of the metal ions

**Table S1.** Volumetric charge densities of the metal ions.

|    | Valency | Ionic radii (pm) | Atomic number | Electronic structure                 | Computed Ionic volume (pm <sup>3</sup> ) | Computed Charge density (e/pm <sup>3</sup> ) |
|----|---------|------------------|---------------|--------------------------------------|------------------------------------------|----------------------------------------------|
| Zr | 4       | 72.0             | 40            | [Kr] 4d <sup>2</sup> 5s <sup>2</sup> | $1.56 \times 10^{+6}$                    | $2.56 \times 10^{-6}$                        |
| Sc | 3       | 74.5             | 21            | [Ar] 3d <sup>1</sup> 4s <sup>2</sup> | $1.73 \times 10^{+6}$                    | $1.73 \times 10^{-6}$                        |
| Fe | 3       | 55.0             | 26            | [Ar] 3d <sup>6</sup> 4s <sup>2</sup> | $6.97 \times 10^{+5}$                    | $4.30 \times 10^{-6}$                        |
| Al | 3       | 54.0             | 13            | [Ne] 3s <sup>2</sup> 3p <sup>1</sup> | $6.60 \times 10^{+5}$                    | $4.55 \times 10^{-6}$                        |
| Ti | 4       | 61.0             | 22            | [Ar] 3d <sup>2</sup> 4s <sup>2</sup> | $9.51 \times 10^{+5}$                    | $4.21 \times 10^{-6}$                        |

**References:** Lide, David R., 1995, CRC Handbook of Chemistry and Physics, 76th edition, CRC Press; Peters, E. M., 2022, Recovery of Scandium using Antisolvent Crystallization in the Valorization of Scandium-containing Waste Streams, KTH Royal Institute of Technology, Doctoral thesis

### III. Phase determination of mixed solids after solubility tests in the mixed metal systems

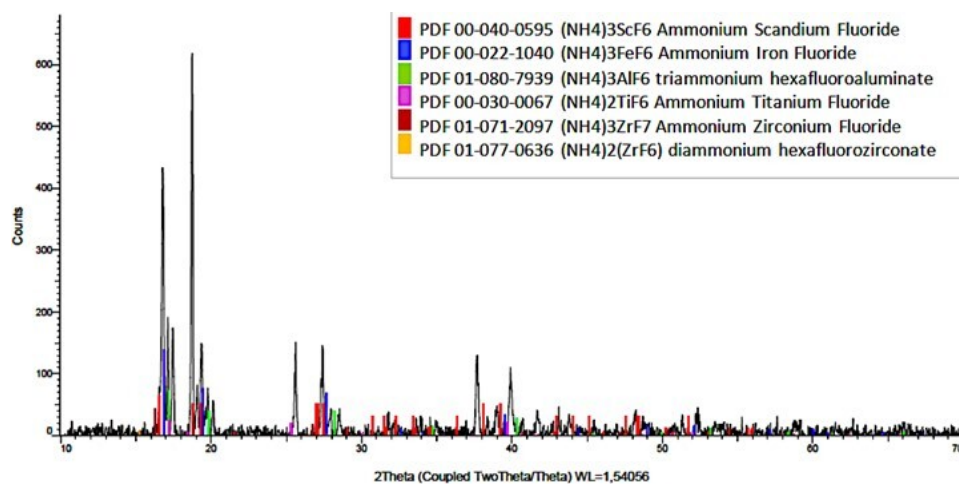

**Figure S2.** XRD patterns of mixed solids after solubility tests for the mixed-metal system
